# Supplementary material
Source: publisher site journal article supplement (https://www.spandidos-publications.com/8581/downloadSupplementary)
Supplement: Supplementary file 1 [file downloadSupplementary]

Table SI. Distribution of clinical, genetic and immune variables across LymphoMAP archetypes in the full DLBCL-2018 cohort.

| Variable          | Overall     | LN          | FMAC        | TEX        |
|-------------------|-------------|-------------|-------------|------------|
| Median age, years | 62.00       | 63.00       | 60.00       | 66.00      |
| Sex               |             |             |             |            |
| F                 | 242 (43.1%) | 78 (43.6%)  | 97 (42.7%)  | 67 (42.9%) |
| M                 | 320 (56.9%) | 101 (56.4%) | 130 (57.3%) | 89 (57.1%) |
| ECOG              |             |             |             |            |
| 0                 | 90 (16.0%)  | 33 (18.4%)  | 24 (10.6%)  | 33 (21.2%) |
| 0.5               | 1 (0.2%)    | 0 (0%)      | 1 (0.4%)    | 0 (0%)     |
| 1                 | 148 (26.3%) | 52 (29.1%)  | 62 (27.3%)  | 34 (21.8%) |
| 1.5               | 2 (0.4%)    | 0 (0%)      | 1 (0.4%)    | 1 (0.6%)   |
| 2                 | 112 (19.9%) | 32 (17.9%)  | 48 (21.1%)  | 32 (20.5%) |
| 3                 | 45 (8.0%)   | 21 (11.7%)  | 11 (4.8%)   | 13 (8.3%)  |
| 4                 | 19 (3.4%)   | 5 (2.8%)    | 8 (3.5%)    | 6 (3.8%)   |
| 5                 | 2 (0.4%)    | 0 (0%)      | 2 (0.9%)    | 0 (0%)     |
| Missing           | 143 (25.4%) | 36 (20.1%)  | 70 (30.8%)  | 37 (23.7%) |
| IPI group         |             |             |             |            |
| High              | 275 (48.9%) | 84 (46.9%)  | 116 (51.1%) | 75 (48.1%) |
| High-Intermediate | 82 (14.6%)  | 32 (17.9%)  | 28 (12.3%)  | 22 (14.1%) |
| Low               | 112 (19.9%) | 33 (18.4%)  | 53 (23.3%)  | 26 (16.7%) |
| Low-Intermediate  | 93 (16.5%)  | 30 (16.8%)  | 30 (13.2%)  | 33 (21.2%) |
| Cell-of-origin    |             |             |             |            |
| ABC               | 286 (50.9%) | 82 (45.8%)  | 112 (49.3%) | 92 (59.0%) |
| GCB               | 162 (28.8%) | 59 (33.0%)  | 75 (33.0%)  | 28 (17.9%) |
| Missing           | 114 (20.3%) | 38 (21.2%)  | 40 (17.6%)  | 36 (23.1%) |
| Genetic subtype   |             |             |             |            |
| BN2               | 98 (17.4%)  | 40 (22.3%)  | 36 (15.9%)  | 22 (14.1%) |
| EZB               | 68 (12.1%)  | 25 (14.0%)  | 33 (14.5%)  | 10 (6.4%)  |
| MCD               | 68 (12.1%)  | 15 (8.4%)   | 33 (14.5%)  | 20 (12.8%) |

|                                        |             |             |             |            |
|----------------------------------------|-------------|-------------|-------------|------------|
| N1                                     | 18 (3.2%)   | 4 (2.2%)    | 4 (1.8%)    | 10 (6.4%)  |
| Other                                  | 310 (55.2%) | 95 (53.1%)  | 121 (53.3%) | 94 (60.3%) |
| Median immune evasion-associated index | -0.07       | -0.35       | 0.40        | -0.23      |
| Treatment                              |             |             |             |            |
| Ibrutinib monotherapy                  | 9 (1.6%)    | 1 (0.6%)    | 7 (3.1%)    | 1 (0.6%)   |
| Immunochemotherapy                     | 234 (41.6%) | 74 (41.3%)  | 90 (39.6%)  | 70 (44.9%) |
| Treatment not specified                | 319 (56.8%) | 104 (58.1%) | 130 (57.3%) | 85 (54.5%) |

Values are shown as counts (%), unless otherwise indicated. ABC, activated B-cell-like; GCB, germinal center B-cell-like; DLBCL, diffuse large B-cell lymphoma; ECOG, Eastern Cooperative Oncology Group; F, female; FMAC, fibroblast-macrophage-rich; IPI, International Prognostic Index; LN, lymph node-like; M, male; TEX, T cell-exhausted.

Table SII. Expression-level evidence for antigen-processing and immune evasion-associated genes in IEAI-high versus IEAI-low cases.

| A, All cohorts               |     |                                   |                        |                        |
|------------------------------|-----|-----------------------------------|------------------------|------------------------|
| Gene                         | n   | Median difference<br>(high - low) | P-value                | Q-value                |
| TAP1                         | 376 | -0.552                            | 1.73x10 <sup>-11</sup> | 1.38x10 <sup>-10</sup> |
| TAP2                         | 376 | -0.556                            | 7.29x10 <sup>-9</sup>  | 2.92x10 <sup>-8</sup>  |
| CIITA                        | 376 | -0.333                            | 0.0002                 | 0.0004                 |
| HLA-A                        | 376 | -0.219                            | 0.0005                 | 0.0010                 |
| HLA-C                        | 376 | -0.223                            | 0.0034                 | 0.0055                 |
| HLA-B                        | 376 | -0.231                            | 0.0052                 | 0.0070                 |
| CD58                         | 376 | 0.136                             | 0.0356                 | 0.0407                 |
| B2M                          | 376 | 0.115                             | 0.7843                 | 0.7843                 |
| B, Discovery (R-CHOP) cohort |     |                                   |                        |                        |
| Gene                         | n   | Median difference<br>(high - low) | P-value                | Q-value                |
| TAP1                         | 156 | -0.746                            | 1.63x10 <sup>-7</sup>  | 1.31x10 <sup>-6</sup>  |
| TAP2                         | 156 | -0.452                            | 0.0030                 | 0.0122                 |
| HLA-A                        | 156 | -0.236                            | 0.0661                 | 0.1762                 |
| HLA-C                        | 156 | -0.062                            | 0.1139                 | 0.2278                 |
| HLA-B                        | 156 | -0.202                            | 0.2187                 | 0.3500                 |
| B2M                          | 156 | 0.021                             | 0.9139                 | 0.9350                 |
| CIITA                        | 156 | -0.025                            | 0.9280                 | 0.9350                 |
| CD58                         | 156 | -0.031                            | 0.9350                 | 0.9350                 |

Median differences are reported as high - low. For each gene listed, expression was compared between IEAI-high and IEAI-low cases within the corresponding analysis set; genes were not compared with one another. Q-values were calculated using the Benjamini-Hochberg procedure to adjust for multiple testing across the gene-level IEAI-high versus IEAI-low comparisons listed in each panel of this table (8 genes in panel A and 8 genes in panel B). IEAI, immune evasion-associated index; R-CHOP, rituximab plus cyclophosphamide, doxorubicin, vincristine and prednisone.

Table SIII. Multivariate Cox regression analyses in the discovery cohort.

| Predictor                                    | HR    | 95% CI       | P-value |
|----------------------------------------------|-------|--------------|---------|
| LymphoMAP: FMAC vs. LN                       | 0.903 | 0.498-1.637  | 0.7374  |
| LymphoMAP: TEX vs. LN                        | 0.612 | 0.318-1.180  | 0.1429  |
| Genetic subtype: MCD vs. BN2                 | 5.005 | 1.890-13.251 | 0.0012  |
| Genetic subtype: N1 vs. BN2                  | 6.057 | 1.594-23.018 | 0.0082  |
| Genetic subtype: EZB vs. BN2                 | 2.775 | 0.951-8.099  | 0.0619  |
| Genetic subtype: Other vs. BN2               | 1.833 | 0.768-4.375  | 0.1724  |
| Immune evasion-associated index (continuous) | 1.077 | 0.863-1.345  | 0.5108  |
| COO: ABC vs. GCB                             | 2.649 | 1.296-5.411  | 0.0075  |
| Age (per year)                               | 1.025 | 1.008-1.043  | 0.0050  |
| IPI: Low-Intermediate vs. Low                | 1.179 | 0.555-2.504  | 0.6684  |
| IPI: High-Intermediate vs. Low               | 1.662 | 0.782-3.530  | 0.1865  |
| IPI: High vs. Low                            | 1.670 | 0.874-3.193  | 0.1206  |

HRs are from the discovery cohort multivariate model including LymphoMAP archetype, genetic subtype, IEAI, COO, age and IPI group. ABC, activated B-cell-like; COO, cell-of-origin; GCB, germinal center B-cell-like; FMAC, fibroblast-macrophage-rich; IPI, International Prognostic Index; LN, lymph node-like; TEX, T cell-exhausted.

Table SIV. External validation summary for overall survival.

| Cohort                              | n     | Events | HR per 1 SD | 95% CI    | P-value |
|-------------------------------------|-------|--------|-------------|-----------|---------|
| GSE10846                            | 233   | 60     | 1.27        | 0.98-1.65 | 0.0733  |
| GSE31312                            | 470   | 170    | 1.01        | 0.87-1.17 | 0.9302  |
| GSE32918                            | 249   | 137    | 1.17        | 0.99-1.38 | 0.0629  |
| GSE87371                            | 221   | 53     | 1.24        | 0.93-1.63 | 0.1385  |
| Pooled random-effects meta-analysis | 1,173 | 420    | 1.13        | 1.01-1.26 | 0.0328  |

Primary external validation treated RScore-Expr as a continuous predictor and reports hazard ratios per 1 standard deviation increase.

Table SV. External validation summary for PFS.

| Cohort                              | n   | Events | HR per 1 SD | 95% CI      | P-value |
|-------------------------------------|-----|--------|-------------|-------------|---------|
| GSE31312                            | 470 | 178    | 1.085       | 0.940-1.253 | 0.2664  |
| GSE87371                            | 221 | 71     | 1.267       | 0.997-1.610 | 0.0528  |
| Pooled random-effects meta-analysis | 691 | 249    | 1.137       | 0.989-1.307 | 0.0716  |

PFS validation was available in a subset of cohorts and is reported as HR per 1 SD increase. HR, hazard ratio; PFS, progression-free survival; SD, standard deviation.

Table SVI. Cohort-level mutation and homozygous deletion frequencies of selected antigen-presentation and immune evasion-associated genes.

| A, Homozygous deletion frequency |       |       |       |              |       |       |       |       |       |
|----------------------------------|-------|-------|-------|--------------|-------|-------|-------|-------|-------|
| Gene                             | Total | ABC   | GCB   | Unclassified | MCD   | BN2   | N1    | EZB   | Other |
| B2M                              | 0.043 | 0.048 | 0.057 | 0.009        | 0.000 | 0.031 | 0.000 | 0.048 | 0.058 |
| CD58                             | 0.043 | 0.076 | 0.013 | 0.000        | 0.157 | 0.031 | 0.000 | 0.000 | 0.032 |
| TAP1                             | 0.021 | 0.024 | 0.013 | 0.027        | 0.029 | 0.021 | 0.000 | 0.000 | 0.026 |
| TAP2                             | 0.021 | 0.024 | 0.013 | 0.027        | 0.029 | 0.021 | 0.000 | 0.000 | 0.026 |
| HLA-B                            | 0.018 | 0.021 | 0.013 | 0.018        | 0.043 | 0.031 | 0.000 | 0.016 | 0.010 |
| HLA-C                            | 0.018 | 0.024 | 0.006 | 0.018        | 0.043 | 0.042 | 0.000 | 0.000 | 0.010 |
| CIITA                            | 0.011 | 0.007 | 0.019 | 0.009        | 0.029 | 0.010 | 0.000 | 0.048 | 0.000 |
| HLA-A                            | 0.002 | 0.000 | 0.006 | 0.000        | 0.000 | 0.000 | 0.000 | 0.000 | 0.003 |
| B, Mutation frequency            |       |       |       |              |       |       |       |       |       |
| Gene                             | Total | ABC   | GCB   | Unclassified | MCD   | BN2   | N1    | EZB   | Other |
| HLA-B                            | 0.216 | 0.293 | 0.086 | 0.207        | 0.623 | 0.301 | 0.053 | 0.014 | 0.154 |
| HLA-A                            | 0.160 | 0.212 | 0.068 | 0.162        | 0.391 | 0.226 | 0.211 | 0.043 | 0.111 |
| B2M                              | 0.159 | 0.112 | 0.250 | 0.148        | 0.056 | 0.255 | 0.105 | 0.246 | 0.136 |
| CD58                             | 0.092 | 0.092 | 0.085 | 0.104        | 0.155 | 0.122 | 0.158 | 0.043 | 0.076 |
| HLA-C                            | 0.072 | 0.102 | 0.031 | 0.054        | 0.188 | 0.140 | 0.053 | 0.014 | 0.039 |
| CIITA                            | 0.054 | 0.034 | 0.098 | 0.043        | 0.042 | 0.061 | 0.000 | 0.130 | 0.041 |
| TAP1                             | 0.029 | 0.042 | 0.025 | 0.000        | 0.101 | 0.011 | 0.053 | 0.014 | 0.020 |
| TAP2                             | 0.013 | 0.014 | 0.000 | 0.027        | 0.014 | 0.054 | 0.000 | 0.000 | 0.003 |

Values were extracted from the public DLBCL-2018 Appendix S2 summary sheets ('Tab S1 Mutation Freq Genes' and 'Tab S6 Hom Del Freq Genes'). ABC, activated B-cell-like; GCB, germinal center B-cell-like.

Table SVII. Correlation of IEAI with ESTIMATE-derived scores.

| A, Full cohort      |     |                    |                        |
|---------------------|-----|--------------------|------------------------|
| Variable            | n   | Spearman<br>$\rho$ | P-value                |
| Tumor purity        | 562 | -0.142             | 0.0008                 |
| Stromal score       | 562 | 0.327              | $2.25 \times 10^{-15}$ |
| Immune score        | 562 | -0.141             | 0.0008                 |
| ESTIMATEScore       | 562 | 0.142              | 0.0008                 |
| B, Discovery cohort |     |                    |                        |
| Variable            | n   | Spearman<br>$\rho$ | P-value                |
| Tumor purity        | 234 | -0.160             | 0.0144                 |
| Stromal score       | 234 | 0.370              | $6.80 \times 10^{-9}$  |
| Immune score        | 234 | -0.162             | 0.0131                 |

Correlations are Spearman coefficients between the IEAI and ESTIMATE-derived variables in the full and discovery cohorts. IEAI, immune evasion-associated index.

Table SVIII. Minimal multivariate Cox models with and without tumor purity

| A, Without purity                               |       |             |         |
|-------------------------------------------------|-------|-------------|---------|
| Predictor                                       | HR    | 95% CI      | P-value |
| LymphoMAP: FMAC vs. LN                          | 1.137 | 0.683-1.894 | 0.6205  |
| LymphoMAP: TEX vs. LN                           | 1.161 | 0.700-1.927 | 0.5622  |
| immune evasion-associated index<br>(continuous) | 1.008 | 0.821-1.238 | 0.9362  |
| Age (per year)                                  | 1.025 | 1.009-1.042 | 0.0021  |
| IPI: Low-Intermediate vs. Low                   | 1.340 | 0.678-2.648 | 0.4001  |
| IPI: High-Intermediate vs. Low                  | 2.256 | 1.208-4.216 | 0.0107  |
| IPI: High vs. Low                               | 2.389 | 1.345-4.243 | 0.0030  |
| B, With purity                                  |       |             |         |
| Predictor                                       | HR    | 95% CI      | P-value |
| LymphoMAP: FMAC vs. LN                          | 1.145 | 0.687-1.910 | 0.6030  |
| LymphoMAP: TEX vs. LN                           | 1.221 | 0.695-2.145 | 0.4872  |
| immune evasion-associated index<br>(continuous) | 1.020 | 0.824-1.262 | 0.8546  |
| Age (per year)                                  | 1.025 | 1.009-1.042 | 0.0020  |
| IPI: Low-Intermediate vs. Low                   | 1.350 | 0.682-2.672 | 0.3891  |
| IPI: High-Intermediate vs. Low                  | 2.248 | 1.202-4.204 | 0.0112  |
| IPI: High vs. Low                               | 2.373 | 1.334-4.221 | 0.0033  |
| Tumor purity                                    | 1.289 | 0.368-4.512 | 0.6915  |

The minimal model includes LymphoMAP archetype, IEAI, age and IPI group. Tumor purity was added as a sensitivity-analysis covariate. FMAC, fibroblast-macrophage-rich; IPI, International Prognostic Index; LN, lymph node-like; TEX, T cell-exhausted.
